# Supplementary material for: Characteristic columnar connectivity caters to cortical computation: Replication, simulation, and evaluation of a microcircuit model
Source: PubMed Central journal article supplement (PMC9615567; doi:10.3389/fnint.2022.923468), 2022-10-03
Supplement: Data_Sheet_1.pdf [file Data_Sheet_1.pdf]

# Supplementary Material

## 1 SUPPLEMENTARY TABLES

### 1.1 Figures

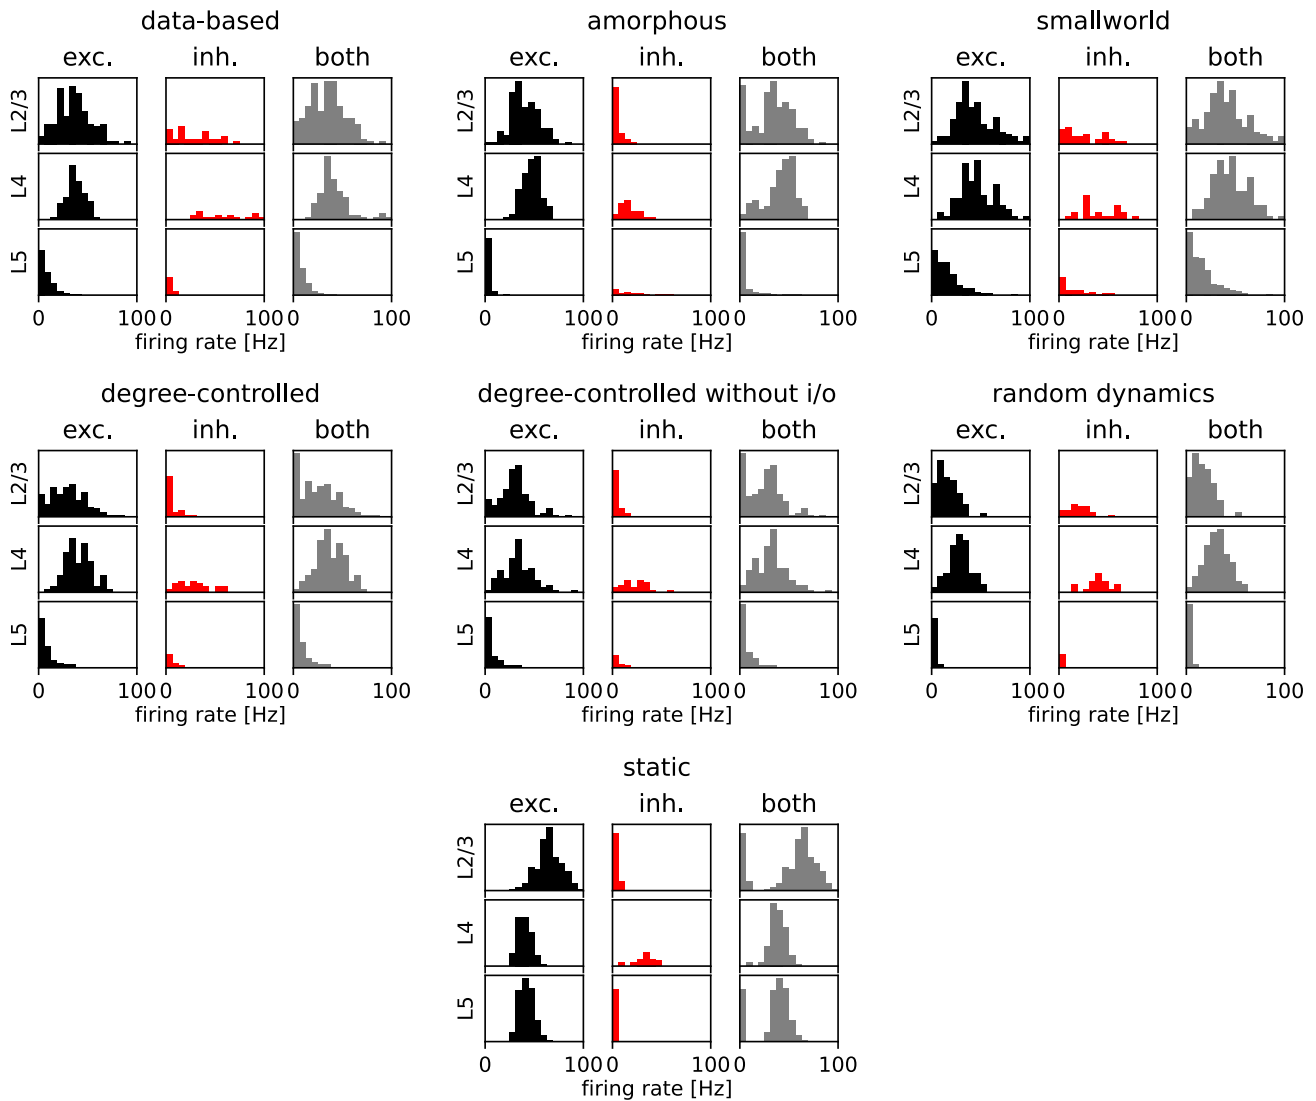

**Figure S1.** Firing rate histograms of the control circuits consisting of Hodgkin-Huxley neurons with conductance noise.

### 1.2 Tables

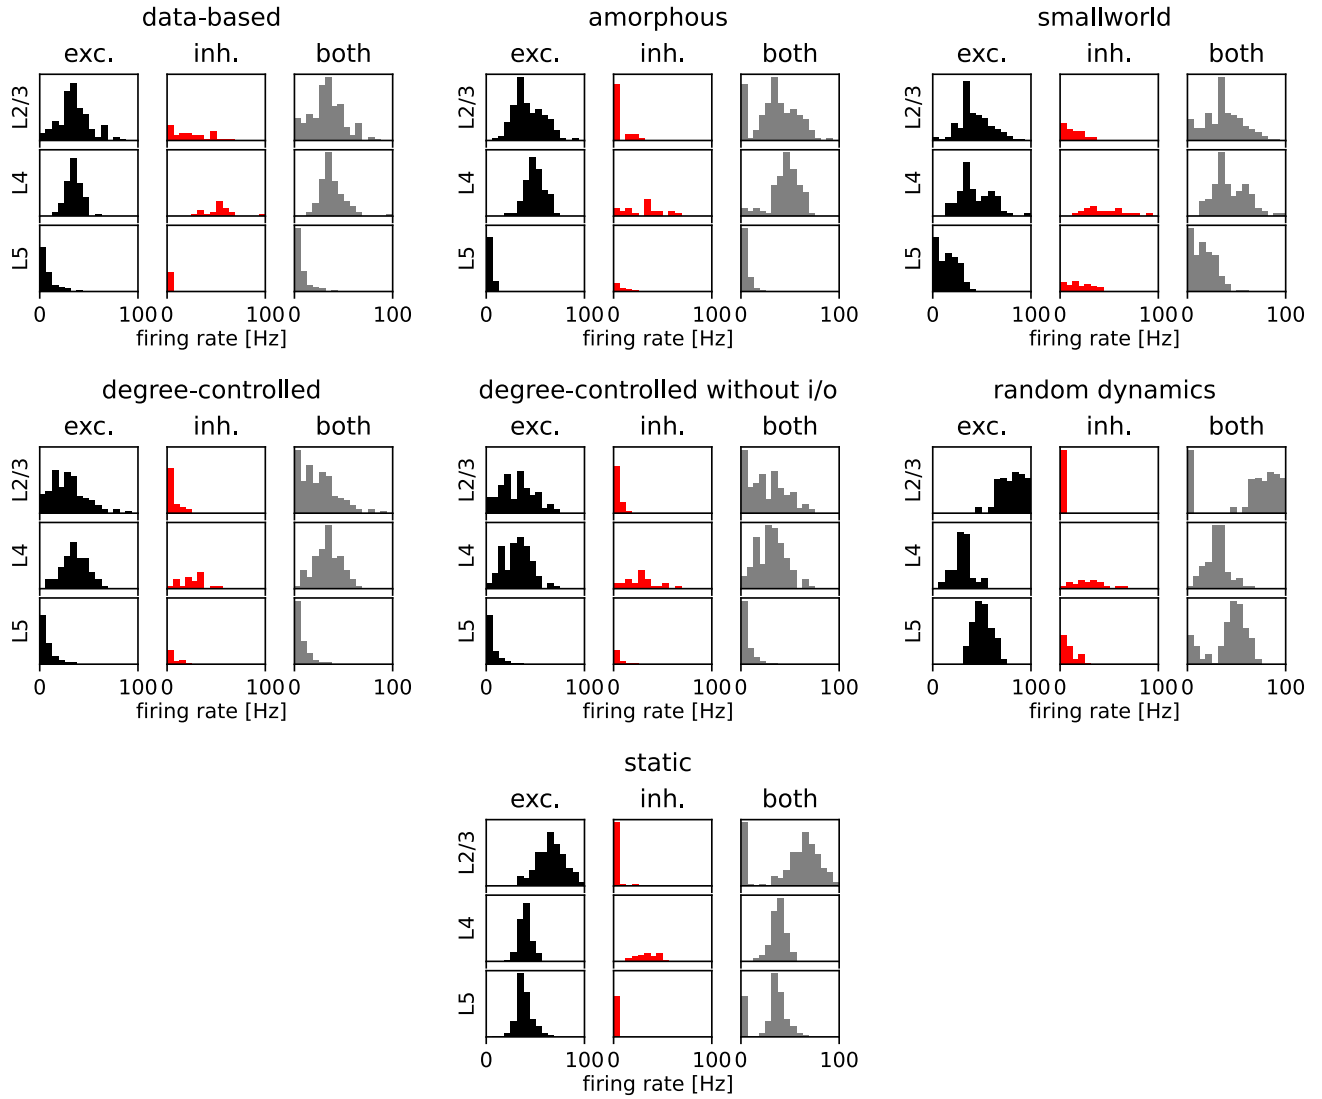

**Figure S2.** Firing rate histograms of the control circuits consisting of Hodgkin-Huxley neurons without conductance noise.

| Tasks/circuits | Amorphous | Small-world | DC    | DC (no io) | Random dynamics | Static synapses |
|----------------|-----------|-------------|-------|------------|-----------------|-----------------|
| memory         | -25.8     | -25.8       | -7.9  | -28.6      | -46.7           | -17.3           |
| nonlinear      | -30.1     | -31.6       | -22.8 | -29.2      | -52             | -18.9           |
| other          | -5.1      | -12.2       | -4    | -17        | -39.7           | -1.6            |
| all            | -16.2     | -20         | -8.9  | -22.8      | -44.2           | -9.7            |

**Table S1.** Performance measures for all control networks consisting of Hodgkin-Huxley neurons without intrinsic conductance noise expressed as average difference (in percent) from the performance of the data-based circuit. All values are averaged over 20 runs.

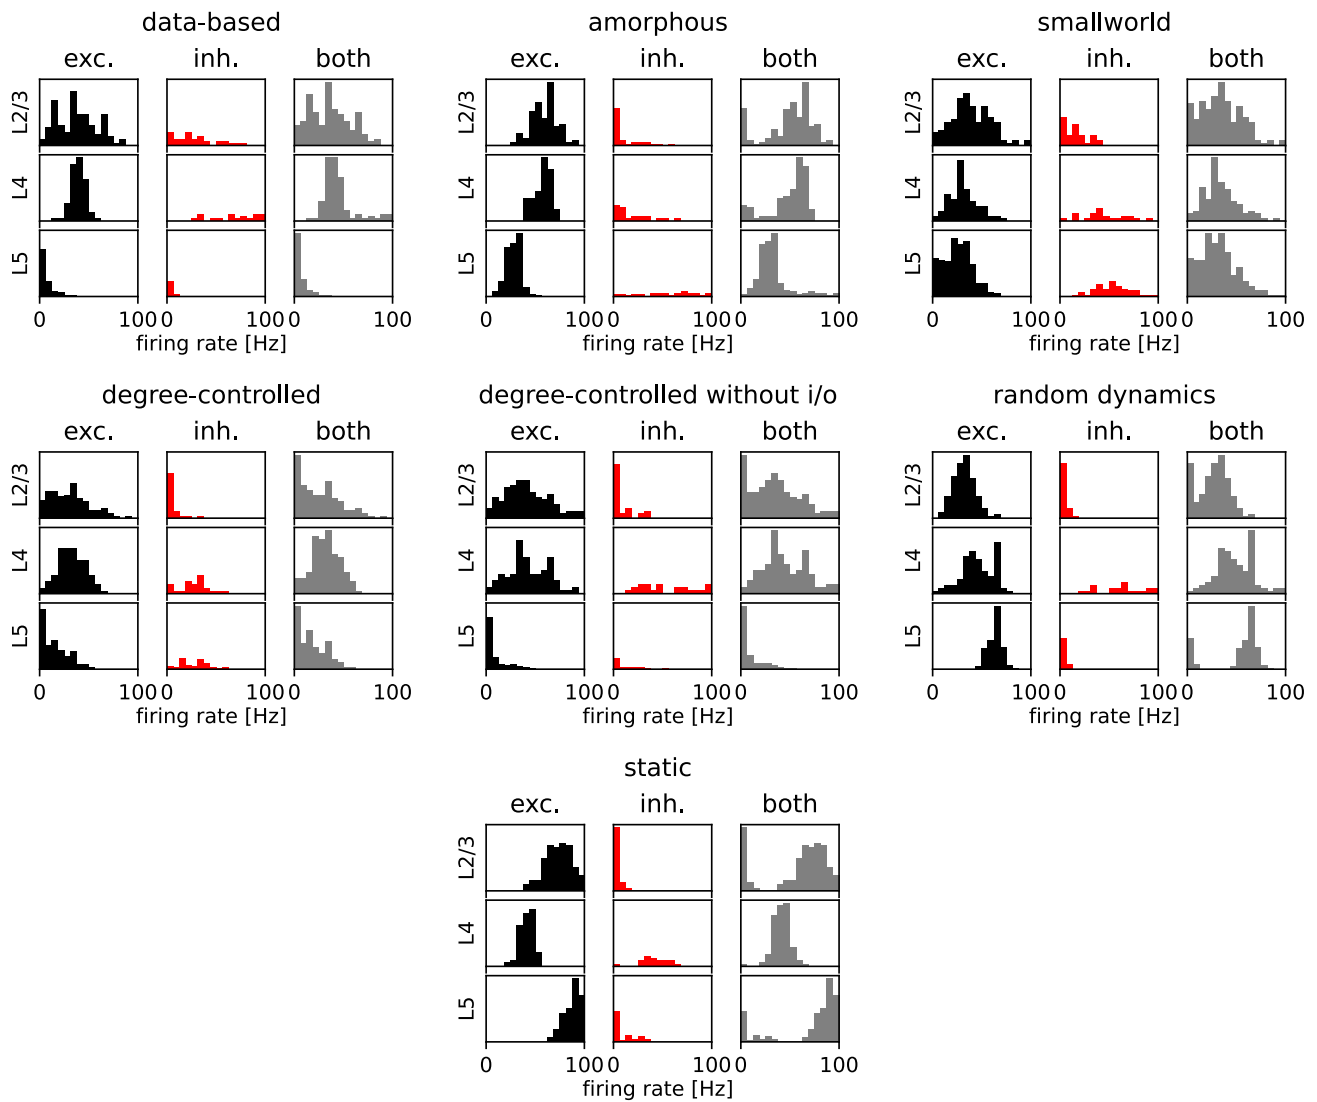

**Figure S3.** Firing rate histograms of the control circuits consisting of integrate-and-fire neurons.

| Tasks/circuits | Amorphous | Small-world | DC    | DC (no io) | Random dynamics | Static synapses |
|----------------|-----------|-------------|-------|------------|-----------------|-----------------|
| memory         | -34.6     | -23.6       | -9.5  | -31.3      | -59.8           | -24.8           |
| nonlinear      | -42.8     | -21.8       | -28.8 | -28.8      | -62.3           | -27             |
| other          | -8.6      | -9.9        | -6.6  | -18.1      | -46.3           | -8              |
| all            | -23.7     | -16.6       | -12   | -24.5      | -53.8           | -17.2           |

**Table S2.** Performance measures for all control networks consisting of integrate-and-fire neurons expressed as average difference (in percent) from the performance of the data-based circuit. All values are averaged over 20 runs.
